# Supplementary material
Source: publisher figshare collection journal article supplement (https://tandf.figshare.com/ndownloader/files/20776266)
Supplement: Supplementary file 1 [file 20776266]

## Appendix

| Related Prime | Unrelated Prime | Intervenor | Target   |
|---------------|-----------------|------------|----------|
| sculptor      | offshore        | conquest   | SCULPTOR |
| mediator      | grandeur        | tutorial   | MEDIATOR |
| approach      | mobility        | peaceful   | APPROACH |
| fortress      | arrogant        | permeate   | FORTRESS |
| graceful      | emphasis        | parental   | GRACEFUL |
| monarchy      | sideways        | horrible   | MONARCHY |
| follower      | relative        | multiply   | FOLLOWER |
| stranger      | vocalize        | daylight   | STRANGER |
| hardship      | finalist        | theorist   | HARDSHIP |
| perceive      | restrict        | employer   | PERCEIVE |
| shredder      | creamery        | eggplant   | SHREDDER |
| solitary      | exemplar        | software   | SOLITARY |
| guaranty      | legalize        | derogate   | GUARANTY |
| artifact      | everyone        | midnight   | ARTIFACT |
| football      | improper        | salesmen   | FOOTBALL |
| irritant      | reaction        | befriend   | IRRITANT |
| memorize      | inhumane        | sunshine   | MEMORIZE |
| pleasure      | resemble        | paranoid   | PLEASURE |
| vocation      | overview        | detector   | VOCATION |
| allergic      | virtuoso        | intimacy   | ALLERGIC |
| prospect      | jeopardy        | educated   | PROSPECT |
| absolute      | humidify        | goldfish   | ABSOLUTE |
| frequent      | overhead        | breeding   | FREQUENT |
| habitant      | forehead        | narcotic   | HABITANT |
| earnings      | unwanted        | acquaint   | EARNINGS |
| punctual      | pipeline        | semantic   | PUNCTUAL |
| meantime      | evaluate        | retrieve   | MEANTIME |
| district      | homeward        | prudence   | DISTRICT |
| fragrant      | climatic        | prophecy   | FRAGRANT |
| scratchy      | adequate        | conclude   | SCRATCHY |
| magazine      | divinity        | latitude   | MAGAZINE |
| fountain      | cookbook        | confront   | FOUNTAIN |
| diagonal      | solidity        | grateful   | DIAGONAL |
| powerful      | surgical        | liberate   | POWERFUL |
| athletic      | elevator        | solidify   | ATHLETIC |
| concrete      | slippery        | wearable   | CONCRETE |
| reliable      | imminent        | delirium   | RELIABLE |

|          |          |          |          |
|----------|----------|----------|----------|
| collapse | sensible | stairway | COLLAPSE |
| fixation | forceful | scornful | FIXATION |
| password | unbiased | selfless | PASSWORD |
| engineer | stagnant | evacuate | ENGINEER |
| practice | cardinal | diminish | PRACTICE |
| merchant | puzzling | shameful | MERCHANT |
| distract | mechanic | mutation | DISTRACT |
| relation | salesman | barefoot | RELATION |
| billiard | musician | preamble | BILLIARD |
| peculiar | platform | barbaric | PECULIAR |
| allocate | majestic | spacious | ALLOCATE |
| thematic | bookcase | constant | THEMATIC |
| entrance | overtake | generate | ENTRANCE |
| property | disclose | mystical | PROPERTY |
| disorder | boastful | examiner | DISORDER |
| occupied | explicit | solitude | OCCUPIED |
| handicap | perverse | addicted | HANDICAP |
| optimism | consumer | devotion | OPTIMISM |
| fearless | interior | sympathy | FEARLESS |
| handsome | childish | prestige | HANDSOME |
| ejection | receiver | obstruct | EJECTION |
| business | poignant | preclude | BUSINESS |
| helpless | trousers | rightful | HELPLESS |
| advanced | maltreat | activism | ADVANCED |
| artistic | hospital | recovery | ARTISTIC |
| minister | distress | scenario | MINISTER |
| downfall | infamous | bracelet | DOWNFALL |
| doubtful | democrat | tomorrow | DOUBTFUL |
| separate | coalesce | reversal | SEPARATE |
| military | preserve | glorious | MILITARY |
| footnote | investor | postcard | FOOTNOTE |
| resident | dedicate | restless | RESIDENT |
| original | postpone | evidence | ORIGINAL |
| scorpion | jubilant | thankful | SCORPION |
| hangover | darkness | impurity | HANGOVER |
| mistrust | drainage | stallion | MISTRUST |
| creature | guerilla | earphone | CREATURE |
| syllable | painting | cleanser | SYLLABLE |
| cylinder | analysis | diligent | CYLINDER |
| religion | universe | ladylike | RELIGION |

|          |          |          |          |
|----------|----------|----------|----------|
| immortal | envelope | training | IMMORTAL |
| rosemary | explorer | dressing | ROSEMARY |
| informal | mortgage | bisexual | INFORMAL |
| aromatic | presence | amputate | AROMATIC |
| airborne | pacifier | dinosaur | AIRBORNE |
| basement | hometown | ceremony | BASEMENT |
| strategy | simplify | feedback | STRATEGY |
| specific | transfer | impolite | SPECIFIC |
| template | shoulder | pharmacy | TEMPLATE |
| antidote | describe | gorgeous | ANTIDOTE |
| validate | fidelity | clarinet | VALIDATE |
| raincoat | indicate | wildlife | RAINCOAT |
| outgoing | commence | humility | OUTGOING |
| harmless | dwelling | motorist | HARMLESS |
| waitress | exposure | swelling | WAITRESS |
| tiresome | serenade | decrease | TIRESOME |
| courtesy | precious | reassure | COURTESY |
| cautious | treasury | vagabond | CAUTIOUS |
| manifest | heritage | ornament | MANIFEST |
| eighteen | baseball | especial | EIGHTEEN |
| sprinkle | farewell | vaporize | SPRINKLE |
| prophecy | omission | freshman | PROPHECY |
| activate | decisive | building | ACTIVATE |
| pinpoint | producer | roadside | PINPOINT |
| question | portrait | downhill | QUESTION |
| majority | sluggish | infinite | MAJORITY |
| insulate | caffeine | grandson | INSULATE |
| armchair | stealthy | humanist | ARMCHAIR |
| reporter | foretell | telltale | REPORTER |
| calendar | infinity | fabulous | CALENDAR |
| official | criteria | calculus | OFFICIAL |
| fragment | doorknob | persuade | FRAGMENT |
| bankrupt | residual | gunfight | BANKRUPT |
| lecturer | merciful | cosmetic | LECTURER |
| leftover | trustful | dialogue | LEFTOVER |
| geometry | particle | discount | GEOMETRY |
| economic | scarcity | ministry | ECONOMIC |
| capacity | intimate | attorney | CAPACITY |
| stagnate | stimulus | location | STAGNATE |
| headline | skylight | progress | HEADLINE |

|          |          |          |          |
|----------|----------|----------|----------|
| renovate | tranquil | doorstep | RENOVATE |
| motivate | hopeless | negation | MOTIVATE |
| compress | deniable | accuracy | COMPRESS |
| simulate | faithful | innocent | SIMULATE |
| estimate | periodic | birthday | ESTIMATE |
| checkout | narrowed | topnotch | CHECKOUT |
| serenity | illumine | affluent | SERENITY |
| disposal | ordinary | outbreak | DISPOSAL |
| indirect | rotation | hesitate | INDIRECT |
| backward | dominate | scissors | BACKWARD |
| opposite | duration | creation | OPPOSITE |
| composer | aptitude | solution | COMPOSER |
| overcome | beverage | cheerful | OVERCOME |
| casualty | dispense | priority | CASUALTY |
| seasonal | sidewalk | uprising | SEASONAL |
| mediocre | deafness | gigantic | MEDIOCRE |
| rainfall | betrayal | converse | RAINFALL |
| umbrella | inherent | symmetry | UMBRELLA |
| loudness | irrigate | infringe | LOUDNESS |
| withdraw | converge | equalize | WITHDRAW |
| upheaval | laziness | obedient | UPHEAVAL |
| abstract | distinct | conflict | ABSTRACT |
| cucumber | burglary | patience | CUCUMBER |
| lipstick | magnetic | glossary | LIPSTICK |
| hardware | chairman | schedule | HARDWARE |
| abortion | bacteria | customer | ABORTION |
| quantity | tropical | domestic | QUANTITY |
| adhesive | unbutton | partisan | ADHESIVE |
| rehearse | ensemble | brochure | REHEARSE |
| innovate | immature | assassin | INNOVATE |
| syndrome | charisma | instinct | SYNDROME |
| sandwich | confound | ointment | SANDWICH |
| inferior | talented | severity | INFERIOR |
| magician | driveway | illusion | MAGICIAN |
| conceive | continue | tailgate | CONCEIVE |
| carnival | variable | impotent | CARNIVAL |
| resonant | harmonic | maximize | RESONANT |
| saucepan | adorable | campfire | SAUCEPAN |
| ultimate | washable | negative | ULTIMATE |
| children | jealousy | monetary | CHILDREN |

|          |          |          |          |
|----------|----------|----------|----------|
| audience | analytic | distrust | AUDIENCE |
| survival | database | vacation | SURVIVAL |
| pressure | fondness | cocktail | PRESSURE |
| promptly | upstream | aviation | PROMPTLY |
| pushover | emergent | blocking | PUSHOVER |
| gullible | material | uppercut | GULLIBLE |
| immersed | prisoner | squirrel | IMMERSED |
| imitator | penalize | vegetate | IMITATOR |
| reformed | tortoise | monument | REFORMED |
| dropping | splinter | forsaken | DROPPING |
| forgiven | vocalist | equipped | FORGIVEN |
| gangster | artistry | moisture | GANGSTER |
| gardener | teaspoon | admonish | GARDENER |
| wasteful | outdated | dreadful | WASTEFUL |
| supplant | brighten | mustache | SUPPLANT |
| paycheck | restrain | volatile | PAYCHECK |
| eyesight | escalate | notation | EYESIGHT |
| sociable | disprove | portable | SOCIABLE |
| exponent | haunting | homesick | EXPONENT |
| diameter | gambling | redactor | DIAMETER |
| variance | idealize | definite | VARIANCE |
| homemade | tangible | abrasion | HOMEMADE |
| deprived | coercive | charcoal | DEPRIVED |
| civilize | enclosed | landlord | CIVILIZE |
| backpack | anterior | doorbell | BACKPACK |
| reversed | suitcase | strangle | REVERSED |
| accident | backbite | aviation | ACCIDENT |
| energize | daydream | cinnamon | ENERGIZE |
| blizzard | alienate | credible | BLIZZARD |
| republic | numbness | swimsuit | REPUBLIC |
| rational | decipher | feminism | RATIONAL |
| response | disguise | adoption | RESPONSE |
| coherent | exchange | wanderer | COHERENT |
| parasite | cynicism | maintain | PARASITE |
| inflated | friendly | daughter | INFLATED |
| marriage | acoustic | accurate | MARRIAGE |
| airbrush | rhythmic | gasoline | AIRBRUSH |
| cohesive | armature | sabotage | COHESIVE |
| neighbor | momentum | stratify | NEIGHBOR |
| complain | kindness | champion | COMPLAIN |

|          |          |          |          |
|----------|----------|----------|----------|
| mistaken | readable | proposal | MISTAKEN |
| congress | sporadic | hazelnut | CONGRESS |
| classify | stalking | ferocity | CLASSIFY |
| suppress | equality | quotient | SUPPRESS |
| barbecue | ancestry | sadistic | BARBECUE |
| violence | sedative | heedless | VIOLENCE |
| bulletin | endpoint | hardness | BULLETIN |
| skillful | coverage | guardian | SKILLFUL |
| workshop | abundant | creative | WORKSHOP |
| highjack | outlying | director | HIGHJACK |
| bleeding | composed | comprise | BLEEDING |
| trillion | minimize | eternity | TRILLION |
| chastity | positive | wreckage | CHASTITY |
| meditate | sunburnt | sibilant | MEDITATE |
| generous | workload | organism | GENEROUS |
| disgrace | topology | identify | DISGRACE |
| blooming | compound | prohibit | BLOOMING |
| activity | snowball | cultural | ACTIVITY |
| confused | division | backyard | CONFUSED |
| numbered | security | militant | NUMBERED |
| volition | luncheon | vastness | VOLITION |
| cannibal | peephole | accustom | CANNIBAL |
| chemical | profound | rigidity | CHEMICAL |
| regional | contrary | entirely | REGIONAL |
| excavate | maternal | appendix | EXCAVATE |
| snapshot | defecate | ruminant | SNAPSHOT |
| testable | overseas | category | TESTABLE |
| locality | softball | suspense | LOCALITY |
| coercion | triangle | marginal | COERCION |
| junction | animated | discover | JUNCTION |
| unloaded | terminal | midpoint | UNLOADED |
| unstable | overcast | colonial | UNSTABLE |
| elective | contempt | surmount | ELECTIVE |
| survivor | heredity | giveaway | SURVIVOR |
| moderate | piercing | encircle | MODERATE |
| fallible | foremost | upstairs | FALLIBLE |
| fraction | mushroom | infusion | FRACTION |
| keyboard | integral | insecure | KEYBOARD |
| advocacy | demolish | airplane | ADVOCACY |
| watchman | textbook | succinct | WATCHMAN |

|               |          |          |               |
|---------------|----------|----------|---------------|
| swimming      | bachelor | listener | SWIMMING      |
| ignorant      | currency | resistor | IGNORANT      |
| EX1: turndown | purchase | dynamite | EX1: TURNDOWN |
| EX2: downturn | purchase | dynamite | EX2: DOWNTURN |
| twatched      | seciders | boursers | TWATCHED      |
| evepopes      | millache | realysis | EVEPOPES      |
| redushed      | pervican | suiloyle | REDUSHED      |
| entently      | regielor | childred | ENTENTLY      |
| dethting      | eimsting | sleckine | DEHTING       |
| favength      | semarked | conoking | FAVENGTH      |
| tesierst      | locising | protbits | TESIERST      |
| fianonce      | mainking | radylems | FIANONCE      |
| arterful      | incriase | toursely | ARTERFUL      |
| blationy      | instring | vasestry | BLATIONY      |
| miscepts      | wontrity | fothured | MISCEPTS      |
| inceival      | speateen | crumsoms | INCEIVAL      |
| cariniss      | troperst | deverest | CARINISS      |
| spinomia      | comjonal | relitics | SPINOMIA      |
| fethaged      | progrely | ghursted | FETHAGED      |
| houtment      | sookshes | crodneel | HOUTMENT      |
| achualry      | espester | starmous | ACHUALRY      |
| starpted      | natchers | solsible | STARPTED      |
| creadful      | pregnies | auddence | CREADFUL      |
| stachidy      | insiging | posspean | STACHIDY      |
| misturen      | younding | feekling | MISTUREN      |
| tonshmis      | majorcle | rategorn | TONSHMIS      |
| curposes      | presting | beligned | CURPOSES      |
| preteyes      | prokring | traimate | PRETEYES      |
| reranness     | declance | requoris | RERANESS      |
| feseoury      | practive | theolver | FESEOURY      |
| starysts      | arradint | interers | STARYSTS      |
| minguate      | valeatin | famphers | MINGUATE      |
| consubed      | possided | attional | CONSUBED      |
| mationts      | tranding | detional | MATIONTS      |
| croivied      | suphasts | creakine | CROIVIED      |
| notchfur      | purdenes | wearknor | NOTCHFUR      |
| exaliged      | stulenth | consuity | EXALIGED      |
| instumer      | acadenly | evidemic | INSTUMER      |
| lictaign      | twellies | eviangle | LICTAIGN      |
| imerosor      | watiever | egyption | IMEROSOR      |

|            |           |          |            |
|------------|-----------|----------|------------|
| reatnete   | increany  | plectics | REATNETE   |
| haindier   | crevican  | renesome | HAINDIER   |
| frambire   | shorming  | conolved | FRAMBIRE   |
| acadence   | empoterd  | somplets | ACADENCE   |
| optessed   | mompless  | repraced | OPTESSED   |
| elestits   | intering  | preaking | ELESTITS   |
| goneting   | prephers  | thoublic | GONETING   |
| storgied   | inquents  | polithie | STORGIED   |
| patioses   | drumpang  | serrying | PATIOSES   |
| nuppalen   | revethal  | applough | NUPPALEN   |
| atheable   | susmects  | contrund | ATHEABLE   |
| acernoul   | snatfols  | carnings | ACERNOUL   |
| emphased   | recomile  | cherying | EMPHASED   |
| barryins   | lociling  | wititans | BARRYINS   |
| apernits   | arritink  | inzurest | APERNITS   |
| freatade   | gentrate  | orippies | FREATADE   |
| sweoided   | genesher  | opproact | SWEOIDED   |
| incrette   | stewares  | diseasis | INCRETTE   |
| bushrood   | labbinall | weliable | BUSHROOD   |
| glecoury   | renested  | involope | GLECOURY   |
| antualed   | picklian  | surcific | ANTUALED   |
| expopite   | roaceent  | comorook | EXPOPITE   |
| reziting   | pleasill  | swithmit | REZITING   |
| egoption   | recenses  | catiming | EGOPTION   |
| somechal   | prodrits  | thropery | SOMECHAL   |
| weroness   | insserate | pomnided | WERONESS   |
| modicule   | trictach  | feelling | MODICULE   |
| dindblic   | eightier  | shroness | DINDBLIC   |
| amerived   | haniship  | symparch | AMERIVED   |
| hespings   | normical  | speaping | HESPINGS   |
| molually   | mealidua  | flandils | MOLUALLY   |
| protione   | cambiama  | negazing | PROTIONE   |
| supachly   | amodican  | gaserown | SUPACHLY   |
| tounting   | canorade  | foreally | TOUNTING   |
| discovered | purpents  | cammunal | DISCOVERED |
| bespently  | infethon  | vandsoms | BESPENLY   |
| lauchter   | sussible  | enterite | LAUCHTER   |
| intushed   | apparther | inkustry | INTUSHED   |
| decaning   | pregably  | borpress | DECANING   |
| spendred   | sealodid  | bequired | SPENDRED   |



|           |          |          |           |
|-----------|----------|----------|-----------|
| swemanan  | projoyts | togetive | SWEMANAN  |
| exturally | mindenly | refation | EXTURALLY |
| bulimarn  | vesolute | discring | BULIMARN  |
| langword  | shownies | contures | LANGWORD  |
| cliginue  | outhough | amytring | CLIGINUE  |
| baralles  | incrence | tronomic | BARALLES  |
| chitlest  | prepated | thintude | CHITLEST  |
| cational  | matength | norgines | CATIONAL  |
| strimton  | granding | pationed | STRIMTON  |
| narlorns  | anflings | gressels | NARLORNS  |
| acturned  | faitager | straughd | ACTURNED  |
| ampeated  | dreaking | seceived | AMPEATED  |
| toieniss  | misigned | remerber | TOIENISS  |
| lavasure  | tonethed | espectly | LAVASURE  |
| follized  | servades | confling | FOLLIZED  |
| fissench  | approval | strected | FISSENC   |
| resthing  | napplish | selieken | RESTHING  |
| atughugs  | invology | prestior | ATUGHUGS  |
| deprough  | pundened | camitian | DEPROUGH  |
| fecienct  | cawbings | opparded | FECIENCT  |
| predered  | whildred | enhagers | PREDERED  |
| delandly  | provicen | busisher | DELANDLY  |
| apesoved  | gightion | painking | APESOVED  |
| covifiss  | striabed | conwents | COVIFISS  |
| excietip  | wonfrach | eurduces | EXCIETIP  |
| exerican  | requiden | commally | EXERICAN  |
| rufemblem | togetery | deficies | RUFEMBLEM |
| bandenal  | gesiggle | paildily | BANDENAL  |
| codember  | plegnade | approgio | CODEMBER  |
| acceners  | reshired | amercome | ACCENERS  |
| everione  | remobing | cominess | EVERIONE  |
| adeolver  | faitical | strasion | ADEOLVER  |
| chinging  | officied | analysed | CHINGING  |
| praivind  | veholoot | discough | PRAIVIND  |
| enddeves  | knaliner | pronomic | ENDDEVES  |
| eudhonce  | thaining | decoment | EUDHONCE  |
| accation  | enteracy | spleress | ACCATION  |
| fuepaled  | prizzled | thraming | FUEPALED  |
| likiting  | inditles | poliving | LIKITING  |
| dosition  | agytring | incisher | DOSITION  |

|          |          |          |          |
|----------|----------|----------|----------|
| intreast | steasure | dimuring | INTREAST |
| retushed | progrout | tolether | RETUSHED |
| frernted | questice | whaniums | FRERNTEd |
| lastants | hossonal | plansary | LASTANTS |
| literach | ugliated | evidents | LITERACH |
| oropecal | scadence | belikess | OROPECAL |
| alitumpt | hightity | pervider | ALITUMPT |
| prentaty | alluales | forected | PRENTATY |
| chathers | moiskely | adoposes | CHATHERS |
| dindinic | strecate | concting | DINDINIC |
| anvanass | swefring | culturen | ANVANASS |
| stundian | rememble | adencing | STUNDIAN |
| strirtes | retaight | anythers | STRIRTES |
| prandred | amercial | fuggeant | PRANDRED |
| evivence | republes | comitity | EVIVENCE |
| reritiar | campting | overible | RERITIAR |
| machance | umbrater | expeases | MACHANCE |
| thinenge | monorink | evercher | THINENGE |
| lagerary | recenged | wherhers | LAGERARY |
| bostemed | returion | anoching | BOSTEMED |
| plermall | belitany | massying | PLERMALL |
| insposes | mollings | remeways | INSPOSES |
| auilonce | bulloded | netionil | AUILONCE |
| dokining | receivab | careshed | DOKINING |
| damoying | prosered | trobably | DAMOYING |
| escteant | vangrest | disasion | ESCTEANT |
| quilarve | chintren | quelence | QUILARVE |
| troualer | formical | natiting | TROUALER |
| clughtly | phyqible | apporman | CLUGHTLY |
| incorane | benofity | minagers | INCORANE |
| belebies | payonins | sudients | BELEBIES |
| entating | tanacher | decended | ENTATING |
| pogasues | drobable | secender | POGASUES |
| cereread | involled | pression | CEREREAD |
| inyponed | oppangth | strather | INYPONED |
| maruible | relikers | wonsumed | MARUIBLE |
| intiress | strinest | distaign | INTIRESS |
| decisity | probages | brinking | DECISITY |
| horrying | plaching | strughts | HORRYING |
| acetraia | manishon | reathers | ACETRAIA |

|            |           |          |            |
|------------|-----------|----------|------------|
| chitived   | inswered  | praction | CHITIVED   |
| crompted   | preparch  | becourse | CROMPTED   |
| studiorn   | hatizent  | patirest | STUDIORN   |
| hecrence   | listents  | propered | HECRENCE   |
| ovirated   | replowed  | allities | OVIRATED   |
| busitivity | liblined  | wilerate | BUSITIVITY |
| replonts   | civition  | relieped | REPLONTS   |
| exeroats   | nepturen  | slemised | EXEROATS   |
| increand   | steakent  | delenent | INCREAND   |
| cararing   | minefise  | reliture | CARARING   |
| comronal   | poldiery  | approger | COMRONAL   |
| airginal   | greasure  | symbined | AIRGINAL   |
| rirkered   | reparaft  | absessed | RIRKERED   |
| bealdang   | secouren  | bouthing | BEALDANG   |
| burthiot   | lourcoal  | prothing | BURTHIOT   |
| anvisior   | ammuires  | finginal | ANVISIOR   |
| berended   | fomranly  | muttemen | BERENDED   |
| cresuced   | steating  | clightly | CRESUCED   |
| mododret   | moutribe  | requived | MODODRET   |
| dilading   | resputer  | ameriers | DILADING   |
| secepses   | innories  | posinent | SECEPSES   |
| fustiard   | carained  | porginal | FUSTIARD   |
| dromured   | isolions  | pretocks | DROMURED   |
| untiving   | whention  | engrance | UNTIVING   |
| adopened   | follines  | stugants | ADOPENED   |
| pamerend   | retually  | anythill | PAMEREND   |
| decurded   | profough  | bugglary | DECURDED   |
| napotiss   | accuries  | fatizent | NAPOTISS   |
| congused   | positics  | artished | CONGUSED   |
| aufowite   | provioous | vilowics | AUFOWITE   |
| fapopion   | batirmed  | intilate | FAPOPION   |
| stranelly  | catensed  | poshibre | STRANELY   |
| marposed   | physider  | sundreds | MARPOSED   |
| labesman   | surcidox  | enjurite | LABESMAN   |
| catecars   | sympater  | darriage | CATECARS   |
| pacranis   | millened  | relected | PACRANIS   |
| redlince   | outtries  | striwing | REDLINCE   |
| swesious   | sudicate  | cotteres | SWESIOUS   |
| ampipite   | instinal  | powerest | AMPIPITE   |
| killical   | suitiner  | earrific | KILLICAL   |

|          |           |           |          |
|----------|-----------|-----------|----------|
| manfiged | togetics  | desitude  | MANFIGED |
| arrected | hossinly  | thiluded  | ARRECTED |
| bupadity | comtoses  | remelogy  | BUPADITY |
| fathater | nathough  | sewsrous  | FATHATER |
| greatise | imagrely  | pleaking  | GREATISE |
| capteger | securred  | buitised  | CAPTEGER |
| cropling | dissiont  | revember  | CROPLING |
| intiting | sublized  | domposes  | INTITING |
| enysping | fresting  | opponngth | ENYSPING |
| comuling | pollents  | argazing  | COMULING |
| anophing | happents  | teacests  | ANOPHING |
| denthist | interals  | preadian  | DENTHIST |
| chepling | mounnest  | alphough  | CHEPLING |
| brousing | conturen  | remested  | BROUSING |
| dethnech | answeren  | hardling  | DETHNECH |
| coliares | chatican  | dossibly  | COLIARED |
| ocoliser | provions  | urstails  | OCOLISER |
| framised | choulter  | contrach  | FRAMISED |
| suimplof | relients  | withough  | SUIMPLOF |
| hanoshed | thinting  | deculgen  | HANOSHED |
| folevice | shronges  | busities  | FOLEVICE |
| agencial | glothing  | suddened  | AGENCIAL |
| minished | watefest  | fealysed  | MINISHED |
| bandened | kersonal  | prompted  | BANDENED |
| catopite | objecits  | stanning  | CATOPITE |
| inysumic | prompting | tomerey   | INYSUMIC |
| everibly | remebody  | colturen  | EVERIBLY |
| churphed | relition  | worneved  | CHURPHED |
| charcher | mocisand  | acturate  | CHARCHER |
| adjusses | folikelf  | studenly  | ADJUSSES |
| marpleng | gracifer  | pargings  | MARPLENG |
| vomblice | comorter  | remaight  | VOMBLICE |
| hatiosts | standays  | chantion  | HATIOSTS |
| estiming | regimate  | clueezed  | ESTIMING |
| cunowets | altherns  | frepance  | CUNOWETS |
| mormures | distaing  | salaping  | MORMURES |
| polotury | behicily  | lodywoon  | POLOTURY |
| laughtly | talateen  | envently  | LAUGHTLY |
| faminess | sconomic  | compless  | FAMINESS |
| fomirnty | elboting  | sligings  | FOMIRNTY |

chichren  
chadwars  
cirected  
surocial

murongle  
offorter  
optigned  
highters

ameryons  
steparch  
ancluder  
peanding

CHICHREN  
CHADWARS  
CIRECTED  
SUROCIAL
